# Supplementary material for: Growth dynamics, reproductive biology, and nutritional profiling of the freshwater mussel Lamellidens marginalis (Lamarck, 1819): implications for wild stock conservation and sustainable aquaculture development
Source: Frontiers journal article supplement (doi:10.3389/fsufs.2025.1562686), 2025-08-13
Supplement: Table_1.docx [file Table_1.docx]

Supplementary files

Table S1. Monthly mean variations of environmental parameters

| Months | Temperature (0C) | Transparency (cm) | DO (mg/L) | pH | Alkalinity (mg/L) |
| --- | --- | --- | --- | --- | --- |
| January | 18.37±0.32d | 29.77±0.31b | 4.83±0.35c | 6.63±0.38b | 78.67±0.45c |
| February | 19.53±0.15d | 28.070±0.38b | 5.43±0.15bc | 6.43±0.25b | 76.73±0.40c |
| March | 23.20±0.20c | 22.40±0.61cd | 5.67±0.15bc | 7.37±0.15ab | 78.97±0.50c |
| April | 27.80±0.30c | 23.70±0.36c | 6.17±0.06ab | 7.63±0.06a | 84.17±1.00b |
| May | 31.43±0.21b | 24.60±0.50c | 5.50±0.10bc | 7.23±0.21ab | 89.90±1.15a |
| June | 31.40±0.36b | 20.93±0.51d | 6.23±0.06ab | 7.13±0.12ab | 95.77±0.67a |
| July | 31.43±0.21b | 24.60±0.50bc | 5.57±0.06bc | 7.23±0.21ab | 89.90±1.15a |
| August | 34.47±0.06a | 25.10±0.30bc | 5.43±0.25bc | 7.30±0.26ab | 81.63±0.75b |
| September | 30.43±0.21b | 26.10±0.35bc | 6.20±0.26ab | 7.23±0.06ab | 83.67±0.76b |
| October | 25.50±0.10c | 28.20±0.70b | 6.27±0.25ab | 7.27±0.15ab | 75.03±0.50c |
| November | 21.50±0.26cd | 27.23±0.47bc | 7.10±0.10a | 6.57±0.15b | 68.30±0.17d |
| December | 19.57±0.21d | 31.17±0.45a | 5.47±0.25bc | 7.73±0.06a | 66.83±0.61d |
| F-value | 1790.76 | 124.81 | 27.47 | 12.89 | 410.41 |
| P-value | 0.000 | 0.000 | 0.000 | 0.000 | 0.000 |

Table S2. Monthly variations in the biochemical body composition of *L. marginalis*

| Months | Moisture | Carbohydrates | Protein | Lipids |
| --- | --- | --- | --- | --- |
| January | 75.14±1.01a | 19.60±1.88bc | 20.96±2.21f | 5.98±0.40e |
| February | 75.73±0.55a | 9.79±1.23f | 23.34±2.45e | 8.81±0.75c |
| March | 75.73±0.55a | 9.79±1.23f | 23.34±2.45e | 8.81±0.75c |
| April | 75.77±0.91a | 18.28±1.33cd | 24.08±2.46e | 7.61±1.21d |
| May | 74.85±0.70a | 17.48±1.52de | 34.43±2.01c | 9.32±2.31bc |
| June | 74.70±1.09a | 16.48±1.41e | 41.26±2.19a | 13.43±1.46a |
| July | 74.97±1.22a | 16.40±1.83e | 37.60±1.99b | 10.07±1.69b |
| August | 77.50±2.21a | 17.66±1.93de | 27.42±1.63d | 6.55±0.76e |
| September | 75.36±1.20a | 19.35±1.70bc | 23.50±1.48e | 3.88±.71g |
| October | 76.00±1.20a | 19.09±1.37bcd | 24.16±2.33e | 4.72±0.63fg |
| November | 76.47±6.04a | 20.56±2.27ab | 25.22±1.17e | 5.45±0.81ef |
| December | 75.76±1.47a | 21.86±2.11a | 25.16±2.83e | 5.89±1.10e |
| F-value | 1.39 | 51.04 | 91.83 | 52.65 |
| P-value | 0.19 | 0.00 | 0.00 | 0.00 |
